# Supplementary material for: Intake of Fruit, Vegetables, and Fruit Juices and Risk of Diabetes in Women
Source: Oxford University Press journal article supplement (doi:10.2337/dc08-0080), 2008-06-07

**SUPPLEMENTARY LEGENDS\**

Supplementary FIG. 1. Biopsy of the major organs such as kidney and heart was done after 25 mg/kg/day imatinib treatment for 4 weeks. (H & E staining)


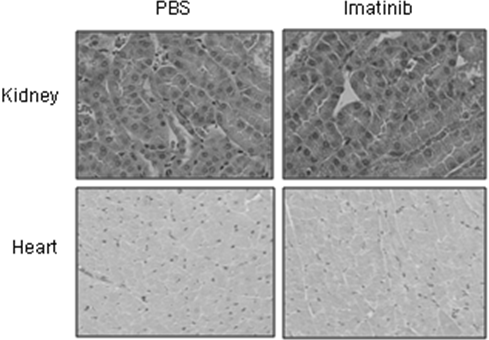


Supplementary Table 1. Blood cell counts and chemistry in *db/db* mice treated with 25 mg/kg imatinib for 4 weeks. Hematocrit was significantly decreased by imatinib treatment but was still within normal limits. Serum TG was significantly decreased after imatinib treatment probably due to improvement of lipid profile, while still higher than that of C57BL/6 mice (see Fig. 4*D*). (*, *P* < 0.05; **, *P* < 0.01 *vs.* control *db/db* mice treated with PBS)


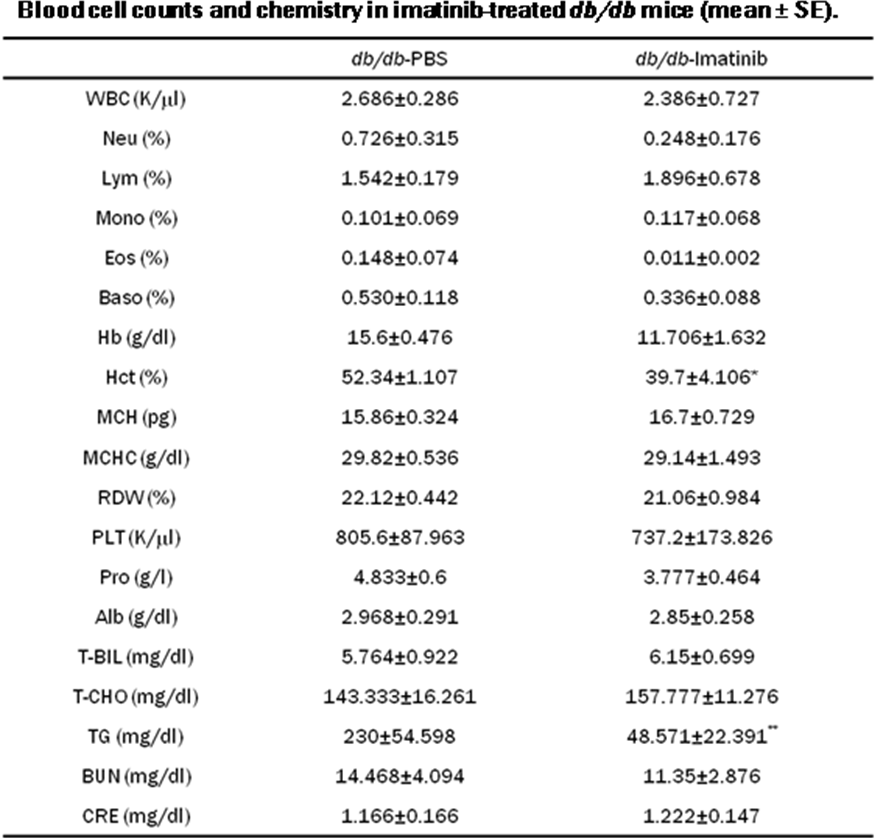

Supplement: dc080080-sup-db08-00801_suppl.doc [file dc080080-sup-db08-00801_suppl.doc]
